# Supplementary material for: The role of surface copper content on biofilm formation by drinking water bacteria
Source: Royal Society of Chemistry journal article supplement (doi:10.1039/c9ra05880j), 2019-01-01
Supplement: c9ra05880j1.pdf [file c9ra05880j1.pdf]

**Table S.1** - Characteristics of the copper materials tested for biofilm control, leaching and corrosion. This information was provided by the suppliers

| Alloy designation | Cu (%) | Other elements (%)                                                                                           | Toughness HB (250/5/30) | Breaking stress – Rm (MPa) | Yield stress Rp 0.2% (MPa) | Stretching (%) | Supplier                        |
|-------------------|--------|--------------------------------------------------------------------------------------------------------------|-------------------------|----------------------------|----------------------------|----------------|---------------------------------|
| C11000            | 99.9   | -                                                                                                            | 89                      | 280                        | 240                        | 6              | Universal AFIR, Porto, Portugal |
| C18000            | 96.17  | Cr – 0.27<br>Ni – 2.87<br>Si – 0.69                                                                          | 212                     | n.a.                       | n.a.                       | n.a.           | Universal AFIR, Porto, Portugal |
| C90800            | 87.13  | Sn – 11.84<br>Zn- 0.03<br>PB – 0.62<br>P – 0.32<br>Al, Mn, Si, As, S,<br>Ni < 0.01<br>Fe – 0.03<br>Sb – 0.02 | 121.0                   | 350                        | 196                        | 7              | Novacimnor, Porto, Portugal     |
| C95500            | 79.58  | Al – 9.49<br>Fe – 4.71<br>Mn – 1.06<br>Ni – 4.77<br>Pb – 0.03<br>Sn – 0.02<br>Zn – 0.34                      | 177                     | n.a.                       | n.a.                       | n.a.           | Universal AFIR, Porto, Portugal |
| C19638            | 57.5   | Fe – 0.2<br>Ni – 0.1                                                                                         | 485                     | n.a.                       | n.a.                       | 15             | Universal AFIR, Porto, Portugal |

n.a. – this information is not available in data provided by the supplier

**Table S.2.** - Surface energy parameters (Lifshitz-van der Waals component-  $\gamma^{LW}$ ; electron acceptor component –  $\gamma^+$  and electron donor component –  $\gamma^-$ ) and hydrophobicity  $\Delta G_{iwi}$  for the different materials tested. The surface characterization of each material was performed by the sessile drop contact angle measurement, according to Lemos et al.\*

| Material/<br>Copper content | Surface energy parameters (mJ m <sup>-2</sup> ) |               |            |            | $\Delta G_{iwi}$<br>(mJ m <sup>-2</sup> ) |
|-----------------------------|-------------------------------------------------|---------------|------------|------------|-------------------------------------------|
|                             | $\gamma^{LW}$                                   | $\gamma^{AB}$ | $\gamma^+$ | $\gamma^-$ |                                           |
| 0%                          | 35.862                                          | 0             | 0          | 11.91      | -35.77                                    |
| 57%                         | 35.97                                           | 0             | 0          | 15.4       | -26.27                                    |
| 79%                         | 32.49                                           | 0             | 0          | 60         | 52.35                                     |
| 87%                         | 32                                              | 2.67          | 0.042      | 42.71      | 26.83                                     |
| 96%                         | 35.07                                           | 0             | 0          | 26.62      | -0.92                                     |
| 100%                        | 37.42                                           | 0             | 0          | 10.03      | -42.24                                    |

\* Lemos , M., Gomes, I., Mergulhão, F., Melo, L. and Simões, M. 2015. The effects of surface type on the removal of *Bacillus cereus* and *Pseudomonas fluorescens* single and dual species biofilms. Food and Bioproducts Processing 93, 234-241
